## Correction: The heparan sulfate mimetic PG545 interferes with Wnt/ $\beta$ -catenin signaling and significantly suppresses pancreatic tumorigenesis alone and in combination with gemcitabine

Deok-Beom Jung<sup>1,\*</sup>, Miyong Yun<sup>1,\*</sup>, Eun-Ok Kim<sup>1,2</sup>, Jaekwang Kim<sup>1</sup>, Bonglee Kim<sup>1</sup>, Ji Hoon Jung<sup>1</sup>, Enfeng Wang<sup>3</sup>, Debabrata Mukhopadhyay<sup>3</sup>, Edward Hammond<sup>4</sup>, Keith Dredge<sup>4</sup>, Viji Shridhar<sup>5,\*\*</sup> and Sung-Hoon Kim<sup>1,\*\*</sup>

<sup>1</sup> College of Korean Medicine, Kyung Hee University, Seoul, South Korea

<sup>2</sup> Korean Medicine Clinical Trial Center, Kyung Hee University, Seoul, South Korea

<sup>3</sup> Department of Biochemistry and Molecular Biology, MN, USA

<sup>4</sup> Progen Pharmaceuticals Ltd, Brisbane, Queensland, Australia

<sup>5</sup> Experimental Pathology, Mayo Clinic College of Medicine, Rochester, MN, USA

\* These authors contributed equally to this work

\*\* These authors are senior authors

Published: September 24, 2019

**Copyright:** Jung et al. This is an open-access article distributed under the terms of the Creative Commons Attribution License 3.0 (CC BY 3.0), which permits unrestricted use, distribution, and reproduction in any medium, provided the original author and source are credited.

**This article has been corrected:** The IHC pictures of ‘Control #1 group’ and ‘PG545 #2 group’ have been removed from Figure 6. In addition, the ‘Cyclin D1 in Control 1 group’ is mistakenly similar to the IHC picture of ‘PCNA in Gem group’ already presented in Figure 5F. The corrected Figure 6 is shown below. The authors declare that these corrections do not change the results or conclusions of this paper.

Original article: Oncotarget. 2015; 6:4992–5004. <https://doi.org/10.18632/oncotarget.3214>

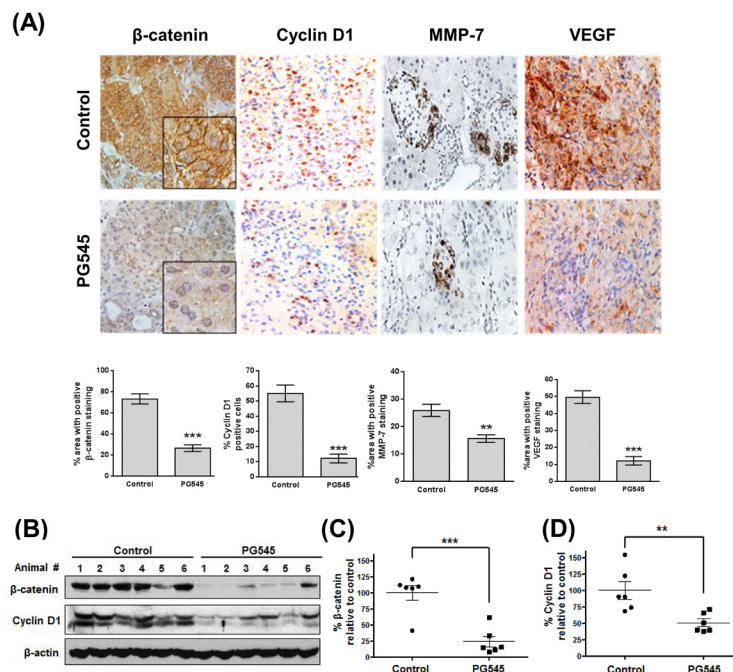

**Figure 6: PG545 inhibits  $\beta$ -catenin signaling in AsPC-1 orthotopic xenograft mouse model.** (A) Immunohistochemical analysis of  $\beta$ -catenin and  $\beta$ -catenin-regulated proteins, Cyclin D1, MMP-7 and VEGF in pancreatic tumor tissues from mice. Quantitation of staining was performed using 10 fields per analyte. \*\*P < 0.01, \*\*\*P < 0.001. (B) Frozen tumor tissues were homogenized on ice and the extracts were subjected to Western blotting. (C)  $\beta$ -catenin and (D) Cyclin D1 levels were quantified by Image J software and plotted relative to the control group in Fig. 6B. \*\*P < 0.01, \*\*\*P < 0.001 vs. control.
